# Supplementary material
Source: publisher figshare collection journal article supplement (https://springernature.figshare.com/ndownloader/files/18005891)
Supplement: Supplementary file 1 [file 18005891]

SiteID	Country	Species	Site	Latitude	Longitude	Elevation	Rbt.raw	Rbt.det	EPS	Site coordinator	Site contact
FIBP19	Finland	Betula pendula	19	66.369	26.732	127.131	0.270	0.300	0.923	Tanja PyhŠjŠrvi, University of Oulu	tanja.pyhajarvi@oulu.fi
FIBP20	Finland	Betula pendula	20	61.656	29.292	89.710	0.310	0.250	0.858	Tanja PyhŠjŠrvi, University of Oulu	tanja.pyhajarvi@oulu.fi
FRBP03	France	Betula pendula	3	44.198	7.068	1417.366	0.280	0.230	0.923	Bruno Fady, Institut Nacional de la Recherche Agronomique	bruno.fady@inra.fr
FRBP04	France	Betula pendula	4	44.840	3.321	995.648	0.490	0.240	0.895	Bruno Fady, Institut Nacional de la Recherche Agronomique	bruno.fady@inra.fr
FRBP21	France	Betula pendula	21	44.206	7.096	1690.520	0.110	0.090	0.510	Bruno Fady, Institut Nacional de la Recherche Agronomique	bruno.fady@inra.fr
DEBP09	Germany	Betula pendula	9	51.837	14.438	61.945	0.390	0.140	0.809	Mirko Liesebach and Birte Pakull, Thunen Institute of Forest Genetics	mirko.liesebach@ thuenen.de birke.pakull@thuenen.de
DEBP10	Germany	Betula pendula	10	52.544	14.053	57.907	0.560	0.360	0.942	Mirko Liesebach and Birte Pakull, Thunen Institute of Forest Genetics	mirko.liesebach@ thuenen.de birke.pakull@thuenen.de
ITBP07	Italy	Betula pendula	7	43.611	11.711	1051.836	0.460	0.050	0.497	Ilaria Spanu, Consiglio Nazionale delle Ricerche	ilaria.spanu@ibbr.cnr.it
ITBP08	Italy	Betula pendula	8	42.155	13.617	1552.424	0.180	0.160	0.741	Ilaria Spanu, Consiglio Nazionale delle Ricerche	ilaria.spanu@ibbr.cnr.it
LTBP11	Lithuania	Betula pendula	11	55.031	23.008	56.210	0.400	0.320	0.911	Darius Danusevicius, Vytautas Magnus University	darius.danusevicius@asu.lt
LTBP12	Lithuania	Betula pendula	12	54.620	24.229	112.782	0.570	0.480	0.953	Darius Danusevicius, Vytautas Magnus University	darius.danusevicius@asu.lt
NOBP15	Norway	Betula pendula	15	59.815	11.027	261.291	0.270	0.220	0.893	Mari Mette Tollefsrud, Norwegian Institute of Bioeconomy Research	mari.mette.tollefsrud@nibio.no
NOBP16	Norway	Betula pendula	16	60.802	10.750	187.280	0.540	0.320	0.922	Mari Mette Tollefsrud, Norwegian Institute of Bioeconomy Research	mari.mette.tollefsrud@nibio.no
ESBP01	Spain	Betula pendula	1	41.969	-2.622	1287.295	0.330	0.260	0.921	Fernando Valladares, National Museum of Natural Sciences	valladares@ccma.csic.es
ESBP02	Spain	Betula pendula	2	42.670	-0.321	1063.395	0.250	0.200	0.845	Fernando Valladares, National Museum of Natural Sciences	valladares@ccma.csic.es
SEBP17	Sweden	Betula pendula	17	64.760	18.700	278.117	0.360	0.320	0.930	Berit Gregorsson, Skogforsk	berit.gregorsson@skogforsk.se
SEBP18	Sweden	Betula pendula	18	63.920	19.890	150.949	0.350	0.250	0.887	Berit Gregorsson, Skogforsk	berit.gregorsson@skogforsk.se
CHBP05	Switzerland	Betula pendula	5	46.324	8.957	772.508	0.370	0.190	0.842	Felix Gugerli, Swiss Federal Institute for Forest Snow and Landscape Research WSL	felix.gugerli@wsl.ch
CHBP06	Switzerland	Betula pendula	6	46.136	8.985	990.734	0.180	0.080	0.691	Felix Gugerli, Swiss Federal Institute for Forest Snow and Landscape Research WSL	felix.gugerli@wsl.ch
GBBP13	United Kingdom	Betula pendula	13	54.231	-3.028	15.366	0.290	0.150	0.827	Stephen Cavers, Centre for Ecology and Hydrology	scav@ceh.ac.uk
GBBP14	United Kingdom	Betula pendula	14	57.231	-3.665	279.868	0.250	0.120	0.804	Stephen Cavers, Centre for Ecology and Hydrology	scav@ceh.ac.uk
ATFS13	Austria	Fagus sylvatica	13	46.496	14.067	1258.241	0.250	0.160	0.871	Kurt Rahmskogler, Lieco	ramskogler@sfl.at
ATFS14	Austria	Fagus sylvatica	14	46.584	14.264	539.450	0.090	0.090	0.760	Kurt Rahmskogler, Lieco	ramskogler@sfl.at
FRFS03	France	Fagus sylvatica	3	44.185	5.235	1004.480	0.440	0.520	0.970	Bruno Fady, Institut Nacional de la Recherche Agronomique	bruno.fady@inra.fr
FRFS04	France	Fagus sylvatica	4	44.179	5.243	1363.944	0.260	0.310	0.913	Bruno Fady, Institut Nacional de la Recherche Agronomique	bruno.fady@inra.fr
FRFS05	France	Fagus sylvatica	5	41.863	9.105	1172.354	0.200	0.330	0.953	Bruno Fady, Institut Nacional de la Recherche Agronomique	bruno.fady@inra.fr
FRFS06	France	Fagus sylvatica	6	41.866	9.139	1488.591	0.320	0.320	0.951	Bruno Fady, Institut Nacional de la Recherche Agronomique	bruno.fady@inra.fr
DEFS15	Germany	Fagus sylvatica	15	47.775	12.816	952.246	0.270	0.310	0.911	Florian Knutzen, Bavarian Office for Forest Seeding and Planting	florian.knutzen@asp.bayern.de
DEFS16	Germany	Fagus sylvatica	16	47.770	12.816	1084.053	0.190	0.320	0.932	Florian Knutzen, Bavarian Office for Forest Seeding and Planting	florian.knutzen@asp.bayern.de
DEFS17	Germany	Fagus sylvatica	17	51.162	8.908	339.560	0.380	0.500	0.968	Lars Opgenoorth, Philipps University Marburg	opgenoorth@uni-marburg.de
DEFS18	Germany	Fagus sylvatica	18	51.130	8.978	566.855	0.460	0.510	0.962	Lars Opgenoorth, Philipps University Marburg	opgenoorth@uni-marburg.de
GRFS09	Greece	Fagus sylvatica	9	40.556	23.708	760.380	0.220	0.300	0.874	Filippos Aravanopoulos, Aristotle University of Thessaloniki	aravanop@for.auth.gr
GRFS10	Greece	Fagus sylvatica	10	40.547	23.722	830.946	0.130	0.180	0.877	Filippos Aravanopoulos, Aristotle University of Thessaloniki	aravanop@for.auth.gr
ITFS07	Italy	Fagus sylvatica	7	42.515	13.549	1205.823	0.210	0.140	0.823	Ilaria Spanu, Consiglio Nazionale delle Ricerche	ilaria.spanu@ibbr.cnr.it
ITFS08	Italy	Fagus sylvatica	8	42.502	13.575	1606.804	0.300	0.330	0.927	Ilaria Spanu, Consiglio Nazionale delle Ricerche	ilaria.spanu@ibbr.cnr.it
NOFS21	Norway	Fagus sylvatica	21	59.196	10.051	188.161	0.260	0.360	0.956	Mari Mette Tollefsrud, Norwegian Institute of Bioeconomy Research	mari.mette.tollefsrud@nibio.no
NOFS22	Norway	Fagus sylvatica	22	59.386	10.309	77.644	0.260	0.370	0.956	Mari Mette Tollefsrud, Norwegian Institute of Bioeconomy Research	mari.mette.tollefsrud@nibio.no
ESFS01	Spain	Fagus sylvatica	1	42.673	-0.123	1424.195	0.120	0.200	0.858	Fernando Valladares, National Museum of Natural Sciences	valladares@ccma.csic.es
ESFS02	Spain	Fagus sylvatica	2	42.713	-0.127	1693.299	0.160	0.190	0.859	Fernando Valladares, National Museum of Natural Sciences	valladares@ccma.csic.es
SEFS23	Sweden	Fagus sylvatica	23	55.950	13.725	135.631	0.250	0.340	0.945	Andreas Helmersson, Skogforsk	andreas.helmersson@skogforsk.se
SEFS24	Sweden	Fagus sylvatica	24	56.408	12.982	138.455	0.180	0.170	0.858	Andreas Helmersson, Skogforsk	andreas.helmersson@skogforsk.se
CHFS11	Switzerland	Fagus sylvatica	11	47.237	7.473	866.332	0.290	0.340	0.921	Felix Gugerli, Swiss Federal Institute for Forest Snow and Landscape Research WSL	felix.gugerli@wsl.ch
CHFS12	Switzerland	Fagus sylvatica	12	47.221	7.402	1025.913	0.310	0.210	0.882	Felix Gugerli, Swiss Federal Institute for Forest Snow and Landscape Research WSL	felix.gugerli@wsl.ch
GBFS19	United Kingdom	Fagus sylvatica	19	51.525	-1.027	135.081	0.200	0.290	0.948	Annika Perry, Centre for Ecology and Hydrology	annt@ceh.ah.uk
GBFS20	United Kingdom	Fagus sylvatica	20	51.619	-0.985	203.986	0.190	0.150	0.886	Annika Perry, Centre for Ecology and Hydrology	annt@ceh.ah.uk
ATPA05	Austria	Picea abies	5	47.736	15.808	782.317	0.120	0.150	0.893	Kurt Rahmskogler, Lieco	ramskogler@sfl.at
ATPA06	Austria	Picea abies	6	47.736	15.808	1024.349	0.400	0.210	0.764	Kurt Rahmskogler, Lieco	ramskogler@sfl.at
FIPA17	Finland	Picea abies	17	66.434	26.686	161.790	0.280	0.370	0.917	Tanja PyhŠjŠrvi, University of Oulu	tanja.pyhajarvi@oulu.fi
FIPA18	Finland	Picea abies	18	61.656	29.291	90.193	0.270	0.220	0.860	Tanja PyhŠjŠrvi, University of Oulu	tanja.pyhajarvi@oulu.fi
FRPA21	France	Picea abies	21	44.334	6.482	1886.998	0.130	0.200	0.900	Bruno Fady, Institut Nacional de la Recherche Agronomique	bruno.fady@inra.fr
DEPA09	Germany	Picea abies	9	49.088	13.229	661.213	0.220	0.170	0.868	Lars Opgenoorth, Philipps University Marburg	opgenoorth@uni-marburg.de
DEPA10	Germany	Picea abies	10	49.086	13.285	1225.116	0.240	0.300	0.935	Lars Opgenoorth, Philipps University Marburg	opgenoorth@uni-marburg.de
GRPA07	Greece	Picea abies	7	41.530	24.284	1716.794	0.160	0.190	0.814	Filippos Aravanopoulos, Aristotle University of Thessaloniki	aravanop@for.auth.gr
GRPA08	Greece	Picea abies	8	41.485	24.334	1507.150	0.120	0.170	0.886	Filippos Aravanopoulos, Aristotle University of Thessaloniki	aravanop@for.auth.gr
ITPA03	Italy	Picea abies	3	46.511	12.134	1214.227	0.100	0.230	0.907	Andrea Piotti, Consiglio Nazionale delle Ricerche	andrea.piotti@ibbr.cnr.it
ITPA04	Italy	Picea abies	4	46.485	12.109	2013.948	0.190	0.280	0.939	Andrea Piotti, Consiglio Nazionale delle Ricerche	andrea.piotti@ibbr.cnr.it
LTPA11	Lithuania	Picea abies	11	53.969	24.332	129.083	0.250	0.290	0.916	Darius Danusevicius, Vytautas Magnus University	darius.danusevicius@asu.lt
LTPA12	Lithuania	Picea abies	12	55.367	26.197	182.635	0.170	0.250	0.885	Darius Danusevicius, Vytautas Magnus University	darius.danusevicius@asu.lt
NOPA13	Norway	Picea abies	13	59.815	11.027	261.291	0.210	0.350	0.948	Mari Mette Tollefsrud, Norwegian Institute of Bioeconomy Research	mari.mette.tollefsrud@nibio.no
NOPA14	Norway	Picea abies	14	61.457	12.422	705.410	0.230	0.370	0.945	Mari Mette Tollefsrud, Norwegian Institute of Bioeconomy Research	mari.mette.tollefsrud@nibio.no
RUPA19	Russia	Picea abies	19	54.555	58.880	1340.313	0.210	0.220	0.860	Vladimir Semerikov, Institute of Plant and Animal Ecology	semerikov@ipae.uran.ru
RUPA20	Russia	Picea abies	20	54.681	58.804	496.539	0.320	0.300	0.928	Vladimir Semerikov, Institute of Plant and Animal Ecology	semerikov@ipae.uran.ru
SEPA15	Sweden	Picea abies	15	64.760	18.290	296.033	0.250	0.360	0.942	Berit Gregorsson, Skogforsk	berit.gregorsson@skogforsk.se
SEPA16	Sweden	Picea abies	16	64.180	20.060	290.601	0.360	0.440	0.961	Berit Gregorsson, Skogforsk	berit.gregorsson@skogforsk.se
CHPA01	Switzerland	Picea abies	1	46.260	9.220	1388.068	0.280	0.240	0.940	Felix Gugerli, Swiss Federal Institute for Forest Snow and Landscape Research WSL	felix.gugerli@wsl.ch
CHPA02	Switzerland	Picea abies	2	46.256	9.236	1680.696	0.170	0.170	0.860	Felix Gugerli, Swiss Federal Institute for Forest Snow and Landscape Research WSL	felix.gugerli@wsl.ch
FRPP09	France	Pinus pinaster	9	44.968	-1.164	30.555	0.660	0.450	0.956	Bruno Fady, Institut Nacional de la Recherche Agronomique	bruno.fady@inra.fr
FRPP11	France	Pinus pinaster	11	43.234	6.373	368.640	0.330	0.200	0.852	Bruno Fady, Institut Nacional de la Recherche Agronomique	bruno.fady@inra.fr
FRPP12	France	Pinus pinaster	12	43.218	6.361	565.467	0.530	0.360	0.940	Bruno Fady, Institut Nacional de la Recherche Agronomique	bruno.fady@inra.fr
FRPP13	France	Pinus pinaster	13	41.756	9.212	947.047	0.530	0.400	0.942	Bruno Fady, Institut Nacional de la Recherche Agronomique	bruno.fady@inra.fr
FRPP14	France	Pinus pinaster	14	41.816	9.258	548.437	0.440	0.230	0.844	Bruno Fady, Institut Nacional de la Recherche Agronomique	bruno.fady@inra.fr
ITPP15	Italy	Pinus pinaster	15	44.051	9.971	129.526	0.480	0.230	0.870	Francesca Bagnoli, Consiglio Nazionale delle Ricerche	francesca.bagnoli@ibbr.cnr.it
ITPP16	Italy	Pinus pinaster	16	44.012	10.184	365.970	0.220	0.110	0.267	Francesca Bagnoli, Consiglio Nazionale delle Ricerche	francesca.bagnoli@ibbr.cnr.it
ITPP17	Italy	Pinus pinaster	17	43.132	11.243	434.949	0.460	0.390	0.958	Francesca Bagnoli, Consiglio Nazionale delle Ricerche	francesca.bagnoli@ibbr.cnr.it
ITPP18	Italy	Pinus pinaster	18	43.139	11.349	354.466	0.470	0.360	0.917	Francesca Bagnoli, Consiglio Nazionale delle Ricerche	francesca.bagnoli@ibbr.cnr.it
ITPP19	Italy	Pinus pinaster	19	44.418	8.671	384.703	0.390	0.100	0.751	Francesca Bagnoli, Consiglio Nazionale delle Ricerche	francesca.bagnoli@ibbr.cnr.it
ITPP20	Italy	Pinus pinaster	20	44.551	8.645	442.525	0.600	0.250	0.908	Francesca Bagnoli, Consiglio Nazionale delle Ricerche	francesca.bagnoli@ibbr.cnr.it
ESPP01	Spain	Pinus pinaster	1	36.827	-3.941	559.139	0.120	0.130	0.877	Fernando Valladares, National Museum of Natural Sciences	valladares@ccma.csic.es
ESPP02	Spain	Pinus pinaster	2	36.835	-3.924	720.025	0.140	0.210	0.936	Fernando Valladares, National Museum of Natural Sciences	valladares@ccma.csic.es
ESPP03	Spain	Pinus pinaster	3	40.245	-5.122	1079.185	0.460	0.440	0.952	Fernando Valladares, National Museum of Natural Sciences	valladares@ccma.csic.es
ESPP04	Spain	Pinus pinaster	4	40.189	-5.108	600.846	0.390	0.340	0.931	Fernando Valladares, National Museum of Natural Sciences	valladares@ccma.csic.es
ESPP05	Spain	Pinus pinaster	5	41.336	-4.246	826.343	0.670	0.540	0.964	Fernando Valladares, National Museum of Natural Sciences	valladares@ccma.csic.es
ESPP06	Spain	Pinus pinaster	6	41.341	-4.235	826.737	0.320	0.170	0.851	Fernando Valladares, National Museum of Natural Sciences	valladares@ccma.csic.es
ESPP07	Spain	Pinus pinaster	7	39.917	-0.394	715.588	0.520	0.570	0.966	Fernando Valladares, National Museum of Natural Sciences	valladares@ccma.csic.es
ESPP08	Spain	Pinus pinaster	8	39.888	-0.389	703.821	0.440	0.530	0.977	Fernando Valladares, National Museum of Natural Sciences	valladares@ccma.csic.es
FIPS18	Finland	Pinus sylvestris	18	66.439	26.785	203.925	0.580	0.320	0.922	Tanja PyhŠjŠrvi, University of Oulu	tanja.pyhajarvi@oulu.fi
FIPS19	Finland	Pinus sylvestris	19	61.656	29.291	90.289	0.450	0.420	0.954	Tanja PyhŠjŠrvi, University of Oulu	tanja.pyhajarvi@oulu.fi
FRPS03	France	Pinus sylvestris	3	45.568	3.929	1215.646	0.560	0.360	0.937	Catherine Bastien, Institut Nacional de la Recherche Agronomique	catherine.bastien@inra.fr
FRPS04	France	Pinus sylvestris	4	45.404	3.695	732.614	0.440	0.310	0.923	Catherine Bastien, Institut Nacional de la Recherche Agronomique	catherine.bastien@inra.fr
DEPS11	Germany	Pinus sylvestris	11	53.263	13.138	72.740	0.510	0.390	0.945	Mirko Liesebach and Birte Pakull, Thunen Institute of Forest Genetics	mirko.liesebach@ thuenen.de birke.pakull@thuenen.de
DEPS12	Germany	Pinus sylvestris	12	52.975	13.666	79.942	0.180	0.260	0.883	Mirko Liesebach and Birte Pakull, Thunen Institute of Forest Genetics	mirko.liesebach@ thuenen.de birke.pakull@thuenen.de
GRPS09	Greece	Pinus sylvestris	9	40.192	22.148	1272.366	0.460	0.200	0.854	Filippos Aravanopoulos, Aristotle University of Thessaloniki	aravanop@for.auth.gr
GRPS10	Greece	Pinus sylvestris	10	40.270	22.207	1624.637	0.450	0.200	0.865	Filippos Aravanopoulos, Aristotle University of Thessaloniki	aravanop@for.auth.gr
ITPS07	Italy	Pinus sylvestris	7	44.536	10.524	441.994	0.510	0.320	0.913	Andrea Piotti, Consiglio Nazionale delle Ricerche	andrea.piotti@ibbr.cnr.it
ITPS08	Italy	Pinus sylvestris	8	44.537	10.540	619.030	0.380	0.230	0.899	Andrea Piotti, Consiglio Nazionale delle Ricerche	andrea.piotti@ibbr.cnr.it
LTPS20	Lithuania	Pinus sylvestris	20	61.656	29.292	89.710	0.300	0.390	0.940	Darius Danusevicius, Vytautas Magnus University	darius.danusevicius@asu.lt
LTPS21	Lithuania	Pinus sylvestris	21	54.020	24.552	131.000	0.330	0.160	0.672	Darius Danusevicius, Vytautas Magnus University	darius.danusevicius@asu.lt
NOPS15	Norway	Pinus sylvestris	15	59.870	11.054	315.611	0.200	0.290	0.923	Mari Mette Tollefsrud, Norwegian Institute of Bioeconomy Research	mari.mette.tollefsrud@nibio.no
NOPS16	Norway	Pinus sylvestris	16	61.457	12.424	712.428	0.270	0.310	0.936	Mari Mette Tollefsrud, Norwegian Institute of Bioeconomy Research	mari.mette.tollefsrud@nibio.no
ESPS01	Spain	Pinus sylvestris	1	41.028	-3.810	1471.976	0.660	0.390	0.939	Fernando Valladares, National Museum of Natural Sciences	valladares@ccma.csic.es
ESPS02	Spain	Pinus sylvestris	2	40.996	-3.822	1823.366	0.660	0.430	0.955	Fernando Valladares, National Museum of Natural Sciences	valladares@ccma.csic.es
SEPS17	Sweden	Pinus sylvestris	17	63.960	20.350	119.458	0.560	0.300	0.926	Berit Gregorsson, Skogforsk	berit.gregorsson@skogforsk.se
CHPS05	Switzerland	Pinus sylvestris	5	46.133	7.074	1045.648	0.260	0.270	0.900	Felix Gugerli, Swiss Federal Institute for Forest Snow and Landscape Research WSL	felix.gugerli@wsl.ch
CHPS06	Switzerland	Pinus sylvestris	6	46.093	7.074	651.783	0.410	0.350	0.917	Felix Gugerli, Swiss Federal Institute for Forest Snow and Landscape Research WSL	felix.gugerli@wsl.ch
GBPS13	United Kingdom	Pinus sylvestris	13	57.630	-5.364	180.963	0.210	0.230	0.905	Annika Perry, Centre for Ecology and Hydrology	annt@ceh.ah.uk
GBPS14	United Kingdom	Pinus sylvestris	14	57.208	-3.655	409.564	0.460	0.160	0.893	Stephen Cavers, Centre for Ecology and Hydrology	scav@ceh.ac.uk
FRPO04	France	Populus nigra	4	47.877	1.834	92.486	0.350	0.180	0.910	Marc Villar, Institut Nacional de la Recherche Agronomique	marc.villar@inra.fr
FRPO05	France	Populus nigra	5	47.244	-1.461	4.225	0.170	0.160	0.274	Marc Villar, Institut Nacional de la Recherche Agronomique	marc.villar@inra.fr
FRPO06	France	Populus nigra	6	44.755	4.880	131.380	0.320	0.130	0.529	Marc Villar, Institut Nacional de la Recherche Agronomique	marc.villar@inra.fr
FRPO07	France	Populus nigra	7	44.697	5.397	459.186	0.120	0.050	0.676	Marc Villar, Institut Nacional de la Recherche Agronomique	marc.villar@inra.fr
FRPO20	France	Populus nigra	20	44.893	3.919	825.889	0.360	0.120	0.773	Marc Villar, Institut Nacional de la Recherche Agronomique	marc.villar@inra.fr
DEPO08	Germany	Populus nigra	8	51.156	6.833	38.693	0.430	0.260	0.897	Lars Opgenoorth, Philipps University Marburg	opgenoorth@uni-marburg.de
DEPO09	Germany	Populus nigra	9	49.824	8.444	89.228	0.590	0.440	0.958	Lars Opgenoorth, Philipps University Marburg	opgenoorth@uni-marburg.de
DEPO10	Germany	Populus nigra	10	48.048	12.797	377.638	0.230	0.160	0.834	Florian Knutzen, Bavarian Office for Forest Seeding and Planting	florian.knutzen@asp.bayern.de
ITPO14	Italy	Populus nigra	14	45.212	9.056	63.981	0.220	0.150	0.792	Ilaria Spanu, Consiglio Nazionale delle Ricerche	ilaria.spanu@ibbr.cnr.it
ITPO15	Italy	Populus nigra	15	45.237	9.017	69.635	0.180	0.170	0.865	Ilaria Spanu, Consiglio Nazionale delle Ricerche	ilaria.spanu@ibbr.cnr.it
ITPO16	Italy	Populus nigra	16	42.955	11.346	67.545	0.420	0.440	0.959	Ilaria Spanu, Consiglio Nazionale delle Ricerche	ilaria.spanu@ibbr.cnr.it
ITPO17	Italy	Populus nigra	17	43.111	11.316	177.852	0.390	0.130	0.000	Ilaria Spanu, Consiglio Nazionale delle Ricerche	ilaria.spanu@ibbr.cnr.it
ESPO01	Spain	Populus nigra	1	40.161	-4.407	433.907	0.180	0.190	0.865	Juan Jose Robledo Arnuncio, Instituto Nacional de Investigaci—n y Tecnolog’a Agraria y Alimentaria - Centro de Investigaci—n Forestal (INIA-CIFOR)	jjrobledo@gmail.com
ESPO02	Spain	Populus nigra	2	41.585	-0.761	180.992	0.220	0.230	0.933	Juan Jose Robledo Arnuncio, Instituto Nacional de Investigaci—n y Tecnolog’a Agraria y Alimentaria - Centro de Investigaci—n Forestal (INIA-CIFOR)	jjrobledo@gmail.com
CHPO12	Switzerland	Populus nigra	12	46.900	9.542	606.936	0.360	0.350	0.947	Felix Gugerli, Swiss Federal Institute for Forest Snow and Landscape Research WSL	felix.gugerli@wsl.ch
CHPO13	Switzerland	Populus nigra	13	46.284	8.657	447.478	0.130	0.140	0.745	Felix Gugerli, Swiss Federal Institute for Forest Snow and Landscape Research WSL	felix.gugerli@wsl.ch
FRQP03	France	Quercus petraea	3	46.607	0.174	144.020	0.250	0.360	0.951	Christope Plomion, Institut Nacional de la Recherche Agronomique	christophe.plomion@inra.fr
FRQP04	France	Quercus petraea	4	46.623	0.486	119.948	0.280	0.350	0.916	Christope Plomion, Institut Nacional de la Recherche Agronomique	christophe.plomion@inra.fr
DEQP17	Germany	Quercus petraea	17	53.725	10.976	66.878	0.300	0.360	0.930	Mirko Liesebach and Birte Pakull, Thunen Institute of Forest Genetics	mirko.liesebach@ thuenen.de birke.pakull@thuenen.de
DEQP18	Germany	Quercus petraea	18	52.170	14.475	105.433	0.440	0.510	0.961	Mirko Liesebach and Birte Pakull, Thunen Institute of Forest Genetics	mirko.liesebach@ thuenen.de birke.pakull@thuenen.de
ITQP07	Italy	Quercus petraea	7	43.349	10.976	432.575	0.590	0.270	0.920	Francesca Bagnoli, Consiglio Nazionale delle Ricerche	francesca.bagnoli@ibbr.cnr.it
ITQP08	Italy	Quercus petraea	8	43.243	10.786	440.323	0.620	0.210	0.793	Francesca Bagnoli, Consiglio Nazionale delle Ricerche	francesca.bagnoli@ibbr.cnr.it
ITQP09	Italy	Quercus petraea	9	38.142	15.939	1535.591	0.120	0.110	0.870	Francesca Bagnoli, Consiglio Nazionale delle Ricerche	francesca.bagnoli@ibbr.cnr.it
ITQP10	Italy	Quercus petraea	10	38.144	15.938	1564.731	0.180	0.140	0.874	Francesca Bagnoli, Consiglio Nazionale delle Ricerche	francesca.bagnoli@ibbr.cnr.it
LTQP20	Lithuania	Quercus petraea	20	54.169	23.793	156.326	0.290	0.350	0.934	Darius Danusevicius, Vytautas Magnus University	darius.danusevicius@asu.lt
NOQP13	Norway	Quercus petraea	13	58.410	8.490	125.572	0.250	0.430	0.957	Mari Mette Tollefsrud, Norwegian Institute of Bioeconomy Research	mari.mette.tollefsrud@nibio.no
NOQP14	Norway	Quercus petraea	14	58.165	8.127	68.710	0.360	0.510	0.973	Mari Mette Tollefsrud, Norwegian Institute of Bioeconomy Research	mari.mette.tollefsrud@nibio.no
POQP19	Poland	Quercus petraea	19	54.109	22.093	201.966	0.220	0.320	0.924	Darius Danusevicius, Vytautas Magnus University	darius.danusevicius@asu.lt
ESQP01	Spain	Quercus petraea	1	41.796	-1.787	1078.948	0.380	0.260	0.918	Fernando Valladares, National Museum of Natural Sciences	valladares@ccma.csic.es
ESQP02	Spain	Quercus petraea	2	41.796	-1.782	1017.171	0.340	0.310	0.935	Fernando Valladares, National Museum of Natural Sciences	valladares@ccma.csic.es
SEQP15	Sweden	Quercus petraea	15	55.926	13.594	98.471	0.300	0.430	0.950	Andreas Helmersson, Skogforsk	andreas.helmersson@skogforsk.se
SEQP16	Sweden	Quercus petraea	16	56.067	13.272	53.307	0.260	0.370	0.945	Andreas Helmersson, Skogforsk	andreas.helmersson@skogforsk.se
CHQP05	Switzerland	Quercus petraea	5	47.556	8.579	577.506	0.270	0.380	0.914	Felix Gugerli, Swiss Federal Institute for Forest Snow and Landscape Research WSL	felix.gugerli@wsl.ch
CHQP06	Switzerland	Quercus petraea	6	47.556	8.591	589.482	0.210	0.390	0.948	Felix Gugerli, Swiss Federal Institute for Forest Snow and Landscape Research WSL	felix.gugerli@wsl.ch
GBQP11	United Kingdom	Quercus petraea	11	54.233	-3.030	14.039	0.450	0.370	0.909	Stephen Cavers, Centre for Ecology and Hydrology	scav@ceh.ac.uk
GBQP12	United Kingdom	Quercus petraea	12	55.945	-2.525	187.046	0.380	0.320	0.885	Stephen Cavers, Centre for Ecology and Hydrology	scav@ceh.ac.uk
